# Supplementary material for: Early Reoperation Rates and Its Risk Factors after Instrumented Spinal Fusion Surgery for Degenerative Spinal Disease: A Nationwide Cohort Study of 65,355 Patients
Source: MDPI journal article supplement (doi:10.3390/jcm11123338), 2022-06-10
Supplement: s1 [file s1]

**Table S1.** ICD-10 codes for comorbidities including Charlson comorbidities index items and scores.

| Type of comorbidities                  | Category                                        | ICD-10 codes                                                                                                                                     | Scores |
|----------------------------------------|-------------------------------------------------|--------------------------------------------------------------------------------------------------------------------------------------------------|--------|
| Included in Charlson comorbidity index | Myocardial infarction                           | I21, I22, I25.2                                                                                                                                  | 1      |
|                                        | Congestive heart failure                        | I09.9, I11.0, I13.0, I13.2, I25.5, I42.0, I42.5-I42.9, I43, I50, P29.0                                                                           | 1      |
|                                        | Peripheral vascular disease                     | I70, I71, I73.1, I73.8, I73.9, I77.1, I79.0, I79.2, K55.1, K55.8, K55.9, Z95.8, Z95.9                                                            | 1      |
|                                        | Cerebrovascular disease                         | G45, G46, I60-I69, H34.0                                                                                                                         | 1      |
|                                        | Dementia                                        | F00-F03, G30, F05.1, G31.1                                                                                                                       | 1      |
|                                        | Chronic pulmonary disease                       | I27.8, I27.9, J40-J47, J60-J67, J68.4, J70.1, J70.3                                                                                              | 1      |
|                                        | Rheumatologic disease                           | M05, M06, M31.5, M32-M34, M35.1, M35.3, M36.0                                                                                                    | 1      |
|                                        | Peptic ulcer                                    | K25-K28                                                                                                                                          | 1      |
|                                        | Hemiplegia or paraplegia                        | G04.1, G11.4, G80.1, G80.2, G81, G82, G83.0, G83.1, G83.2, G83.3, G83.4, G83.9                                                                   | 2      |
|                                        | Diabetes without complication                   | E10.0, E10.1, E10.6, E10.8                                                                                                                       | 1      |
|                                        | Diabetes with complication                      | E10.9, E11.0, E11.1, E11.6, E11.8, E11.9, E12.0, E12.1, E12.6, E12.8, E12.9, E13.0 E13.1, E13.6, E13.8, E13.9, E14.0, E14.1, E14.6, E14.8, E14.9 | 2      |
|                                        |                                                 | B18, K70.0-K70.3, K70.9, K71.3-K71.5, K71.7, K73, K74, K76.0, K76.2-K76.4, K76.8, K76.9, Z94.4                                                   | 1      |
|                                        |                                                 | I85.0, I85.9, I86.4, I98.2, K70.4, K71.1, K72.1, K72.9, K76.5-K76.7                                                                              | 3      |
|                                        | Mild liver disease                              | I12.0, I13.1, N03.2-N03.7, N05.2-N05.7, N18, N19, N25.0, Z49.0-Z49.2, Z94.0, Z99.2                                                               | 2      |
|                                        | Moderate to severe liver disease                | C00-C26, C30-C34, C37-C41, C43, C45-C58, C60-C76                                                                                                 | 2      |
|                                        | Moderate to severe renal disease                | C81-C85, C88, C90-C97                                                                                                                            | 2      |
|                                        | Any malignancy (including leukemia or lymphoma) | C77-C80                                                                                                                                          | 6      |
|                                        | Metastatic solid tumor                          | B20-B22, B24                                                                                                                                     | 6      |
|                                        | Acquired immunodeficiency syndrome              |                                                                                                                                                  |        |
| Others                                 | Osteoporosis                                    | M80-M82                                                                                                                                          | -      |
|                                        | Parkinson disease                               | G20                                                                                                                                              | -      |
|                                        | End stage renal disease                         | E10.22, E11.22, E12.22, E13.32, E14.22, N18.5, Z99.2 (V001, V003)                                                                                | -      |

**Table S2.** HIRA therapeutic codes for transfusion.

| Type of transfusion     | HIRA therapeutic code                                                                   |
|-------------------------|-----------------------------------------------------------------------------------------|
| Autologous transfusion  | X6001-X6008                                                                             |
| Allogeneous transfusion | X2021, X2022, X2031, X2032, X2091, X2092, X2111, X2131, X2132, X2512, X2515, X9006-9007 |

**Table S3.** HIRA general name codes for used steroids.

| Category of steroid | Type of steroid                                 | ATC code | HIRA general name code |
|---------------------|-------------------------------------------------|----------|------------------------|
| Oral steroid        | deflazacort 6 mg                                | H02AB13  | 140801ATB              |
|                     | dexamethasone 0.5 mg                            | H02AB02  | 141901ATB              |
|                     | dexamethasone 0.75 mg                           | H02AB02  | 141903ATB              |
|                     | betamethasone 0.25 mg + d-chlorpheniramine 2 mg | H02AB01  | 296900ATB              |
|                     | hydrocortisone 10 mg                            | H02AB09  | 116401ATB              |
|                     | hydrocortisone 5 mg                             | H02AB09  | 170901ATB              |
|                     | methylprednisolone 4 mg                         | H02AB04  | 193302ATB              |
|                     | methylprednisolone 1 mg                         | H02AB04  | 193305ATB              |
|                     | prednisolone 5 mg                               | H02AB06  | 217001ATB              |
|                     | triamcinolone 1 mg                              | H02AB08  | 243201ATB              |
|                     | triamcinolone 2 mg                              | H02AB08  | 243202ATB              |
|                     | triamcinolone 4 mg                              | H02AB08  | 243203ATB              |
|                     | fludrocortisone 100 µg                          | H02AA02  | 160201ATB              |
| Intravenous steroid | dexamethasone 4 mg                              | H02AB02  | 142030BIJ              |
|                     | dexamethasone 4 mg                              | H02AB02  | 142230BIJ              |
|                     | dexamethasone 5 mg                              | H02AB02  | 142232BIJ              |
|                     | betamethasone 4 mg                              | H02AB01  | 116530BIJ              |
|                     | hydrocortisone 100 mg                           | H02AB09  | 171201BIJ              |
|                     | methylprednisolone 125 mg                       | H02AB04  | 193601BIJ              |
|                     | methylprednisolone 40 mg                        | H02AB04  | 193603BIJ              |
|                     | methylprednisolone 500 mg                       | H02AB04  | 193604BIJ              |
|                     | triamcinolone 10 mg                             | H02AB08  | 243336BIJ              |
|                     | triamcinolone 40 mg                             | H02AB08  | 243335BIJ              |
|                     | triamcinolone 40 mg                             | H02AB08  | 243337BIJ              |

**Table S4.** Risk factors for reoperation within one year after instrumented spinal fusion surgery for degenerative spinal disease: multivariable analysis.

| Variables                        | Categories                             | Model 1                                          |         | Model 2 (backward)                               |         | Model 3 (bootstrap adjusted)                     | Bias (%) |
|----------------------------------|----------------------------------------|--------------------------------------------------|---------|--------------------------------------------------|---------|--------------------------------------------------|----------|
|                                  |                                        | Adjusted odds ratio<br>(95% confidence interval) | p-value | Adjusted odds ratio<br>(95% confidence interval) | p-value | Adjusted odds ratio<br>(95% confidence interval) |          |
| Age                              | 50-69 vs 20-49 years                   | 1.30 (1.05 - 1.61)                               | 0.018   | 1.31 (1.06 - 1.63)                               | 0.014   | 1.31 (1.10 - 1.57)                               | -0.3%    |
|                                  | 70-79 vs 20-49 years                   | 1.51 (1.19 - 1.92)                               | <0.001  | 1.54 (1.21 - 1.95)                               | <0.001  | 1.56 (1.27 - 1.92)                               | 1.1%     |
|                                  | 80+ vs 20-49 years                     | 1.46 (1.00 - 2.13)                               | 0.053   | 1.49 (1.02 - 2.18)                               | 0.039   | 1.46 (1.06 - 2.01)                               | 2.4%     |
| Sex                              | Male vs female                         | 1.79 (1.58 - 2.03)                               | <0.001  | 1.79 (1.58 - 2.03)                               | <0.001  | 1.33 (1.26 - 1.40)                               | 25.6%    |
| Region                           | Rural vs urban                         | 0.97 (0.83 - 1.15)                               | 0.750   |                                                  |         |                                                  |          |
| Hospital                         | General vs tertiary                    | 1.40 (1.19 - 1.65)                               | <0.001  | 1.39 (1.18 - 1.63)                               | <0.001  | 1.39 (1.22 - 1.62)                               | 1.3%     |
|                                  | Others vs tertiary                     | 1.08 (0.92 - 1.26)                               | 0.360   |                                                  |         |                                                  |          |
| Charlson comorbidity index score | 3-5 vs 0-2                             | 1.01 (0.75 - 1.34)                               | 0.972   |                                                  |         |                                                  |          |
|                                  | ≥6 vs 0-2                              | 0.81 (0.48 - 1.39)                               | 0.450   |                                                  |         |                                                  |          |
| Comorbidities                    | Congestive heart failure               | 1.47 (1.12 - 1.93)                               | 0.005   | 1.46 (1.12 - 1.90)                               | 0.005   | 1.22 (1.08 - 1.36)                               | 48.0%    |
|                                  | Cerebrovascular disease                | 1.01 (0.82 - 1.24)                               | 0.603   |                                                  |         |                                                  |          |
|                                  | Chronic pulmonary disease              | 1.08 (0.80 - 1.46)                               | 0.603   |                                                  |         |                                                  |          |
|                                  | Rheumatologic disease                  | 1.36 (1.06 - 1.74)                               | 0.015   | 1.35 (1.06 - 1.72)                               | 0.016   | 1.17 (1.05 - 1.27)                               | 47.4%    |
|                                  | Peptic ulcer disease                   | 1.26 (1.08 - 1.46)                               | 0.003   | 1.24 (1.08 - 1.44)                               | 0.003   | 1.11 (1.04 - 1.18)                               | 49.8%    |
|                                  | Diabetes, uncomplicated                | 1.21 (1.04 - 1.40)                               | 0.016   | 1.20 (1.04 - 1.38)                               | 0.013   | 1.19 (1.08 - 1.31)                               | 6.0%     |
|                                  | Diabetes, complicated                  | 1.43 (1.08 - 1.87)                               | 0.011   | 1.39 (1.13 - 1.70)                               | 0.002   | 1.09 (1.02 - 1.16)                               | 72.8%    |
|                                  | Renal disease                          | 1.48 (1.00 - 2.21)                               | 0.056   |                                                  |         |                                                  |          |
|                                  | Parkinson disease                      | 2.04 (1.29 - 2.22)                               | 0.002   | 2.03 (1.29 - 2.20)                               | 0.002   | 1.43 (1.12 - 1.80)                               | 49.9%    |
|                                  | End stage renal disease                | 2.19 (1.20 - 4.01)                               | 0.011   | 3.03 (1.85 - 4.98)                               | <0.001  | 1.85 (1.35 - 2.90)                               | 44.5%    |
| Allogeneous transfusion          |                                        | 1.47 (1.28 - 1.69)                               | <0.001  | 1.47 (1.28 - 1.69)                               | <0.001  | 1.21 (1.15 - 1.28)                               | 17.6%    |
| Systemic steroid                 | within 2 weeks vs none                 | 1.43 (1.26 - 1.62)                               | <0.001  |                                                  |         |                                                  |          |
|                                  | Over 2 weeks vs none                   | 1.60 (0.63 - 4.03)                               | 0.323   | 1.43 (1.26 - 1.62)                               | <0.001  | 1.43 (1.29 - 1.56)                               | 0.3%     |
| Surgical approach                | Cervical anterior vs lumbar posterior  | 0.69 (0.56 - 0.86)                               | 0.001   | 0.69 (0.56 - 0.86)                               | 0.001   | 0.70 (0.58 - 0.83)                               | -1.5%    |
|                                  | Cervical posterior vs lumbar posterior | 0.42 (0.24 - 0.74)                               | 0.003   | 0.42 (0.24 - 0.74)                               | 0.003   | 0.40 (0.21 - 0.62)                               | 5.6%     |
|                                  | Thoracic anterior vs lumbar posterior  | 4.29 (1.29 - 14.28)                              | 0.018   | 4.35 (1.31 - 14.46)                              | 0.005   | 0.15 (0.00 - 7.46)                               | 96.5%    |

|      |                    |       |                    |       |                    |       |
|------|--------------------|-------|--------------------|-------|--------------------|-------|
| Cage | 1.27 (1.09 - 1.48) | 0.002 | 1.27 (1.09 - 1.47) | 0.002 | 1.12 (1.04 - 1.21) | 11.8% |
|------|--------------------|-------|--------------------|-------|--------------------|-------|

All significant independent variables ( $p < 0.05$ ) from the univariable analysis were included in this multivariable model. Relative bias was estimated as the difference between the mean bootstrapped regression coefficient estimates (model 3) and the mean parameter estimates of multivariable model (model 2) divided by the mean parameter estimates of multivariable model (model 2).
